# Supplementary material for: L-Arginine Enhances Oral Keratinocyte Proliferation under High-Glucose Conditions via Upregulation of CYP1A1, SKP2, and SRSF5
Source: MDPI journal article supplement (doi:10.3390/molecules28207020), 2023-10-10
Supplement: s1 [file s1]

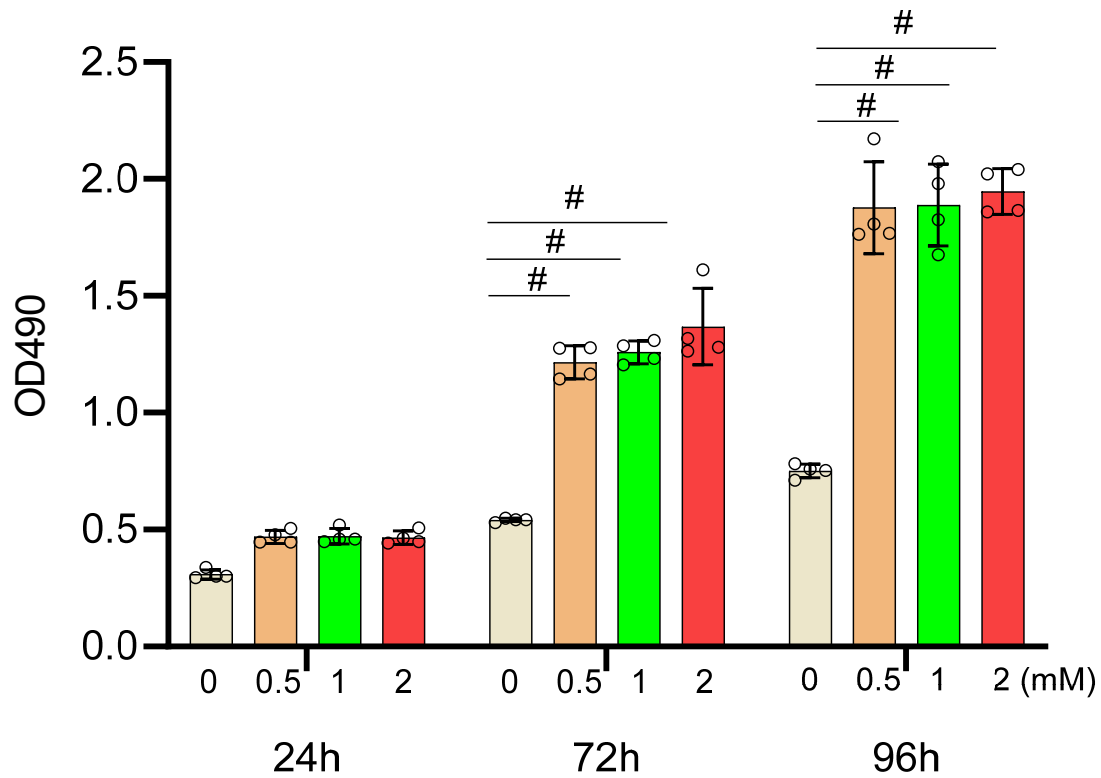

Figure S1: L-Arginine enhances oral keratinocyte proliferation under a low glucose condition (6mM). TIGK cells were treated with Arg with concentrations ranging from 0.5 to 2mM. Proliferation was assessed by an MTS proliferation assay 24-96 hours after treatment. OD490 values were recorded. #  $p < 0.01$  compared to untreated cells.

### ArgH24hvsConH24h.down(BP)

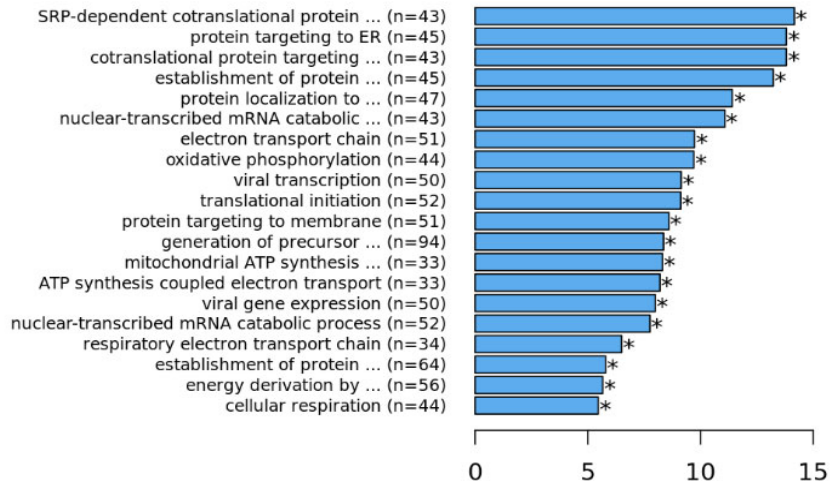

### ArgH24hvsConH24h.down(MF)

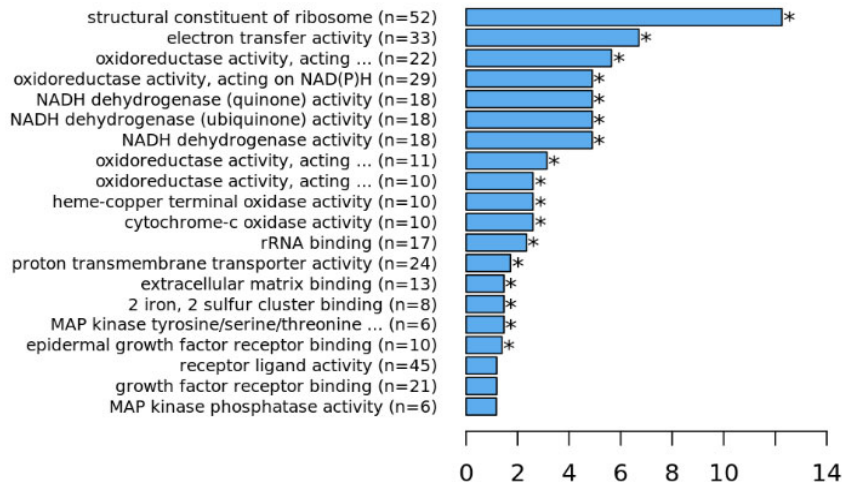

### ArgH24hvsConH24h.down(CC)

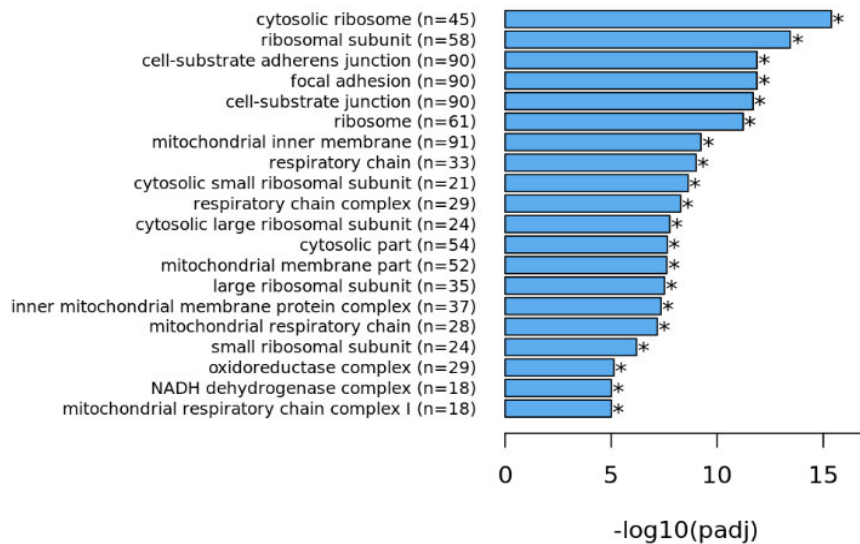

Figure S2: Top 20 downregulated enriched gene ontology (GO) terms (biological processes/BP, molecular functions/MF, and cellular components/CC) 24 hours after Arg treatment under high glucose conditions.

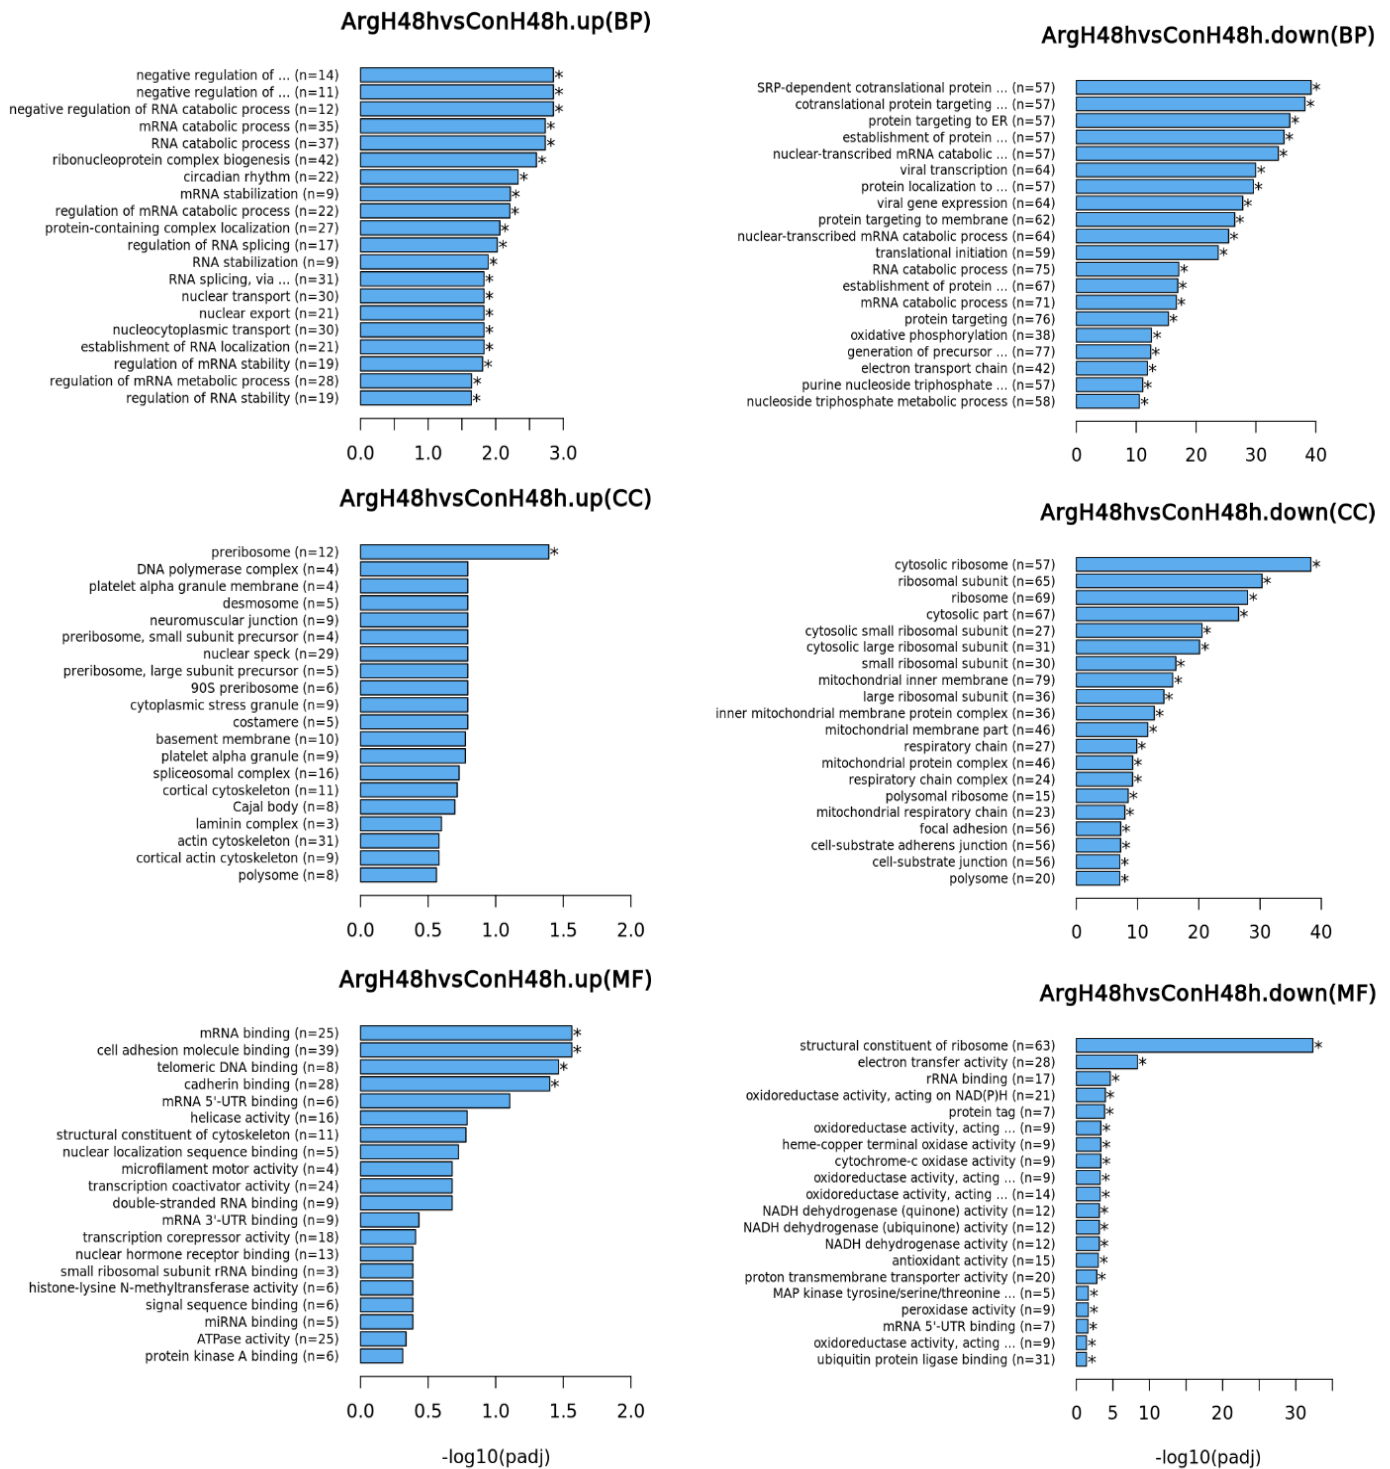

Figure S3: Top 20 upregulated and downregulated enriched gene ontology (GO) terms (biological processes/BP, molecular functions/MF, and cellular components/CC) 48 hours after Arg treatment under high glucose conditions.

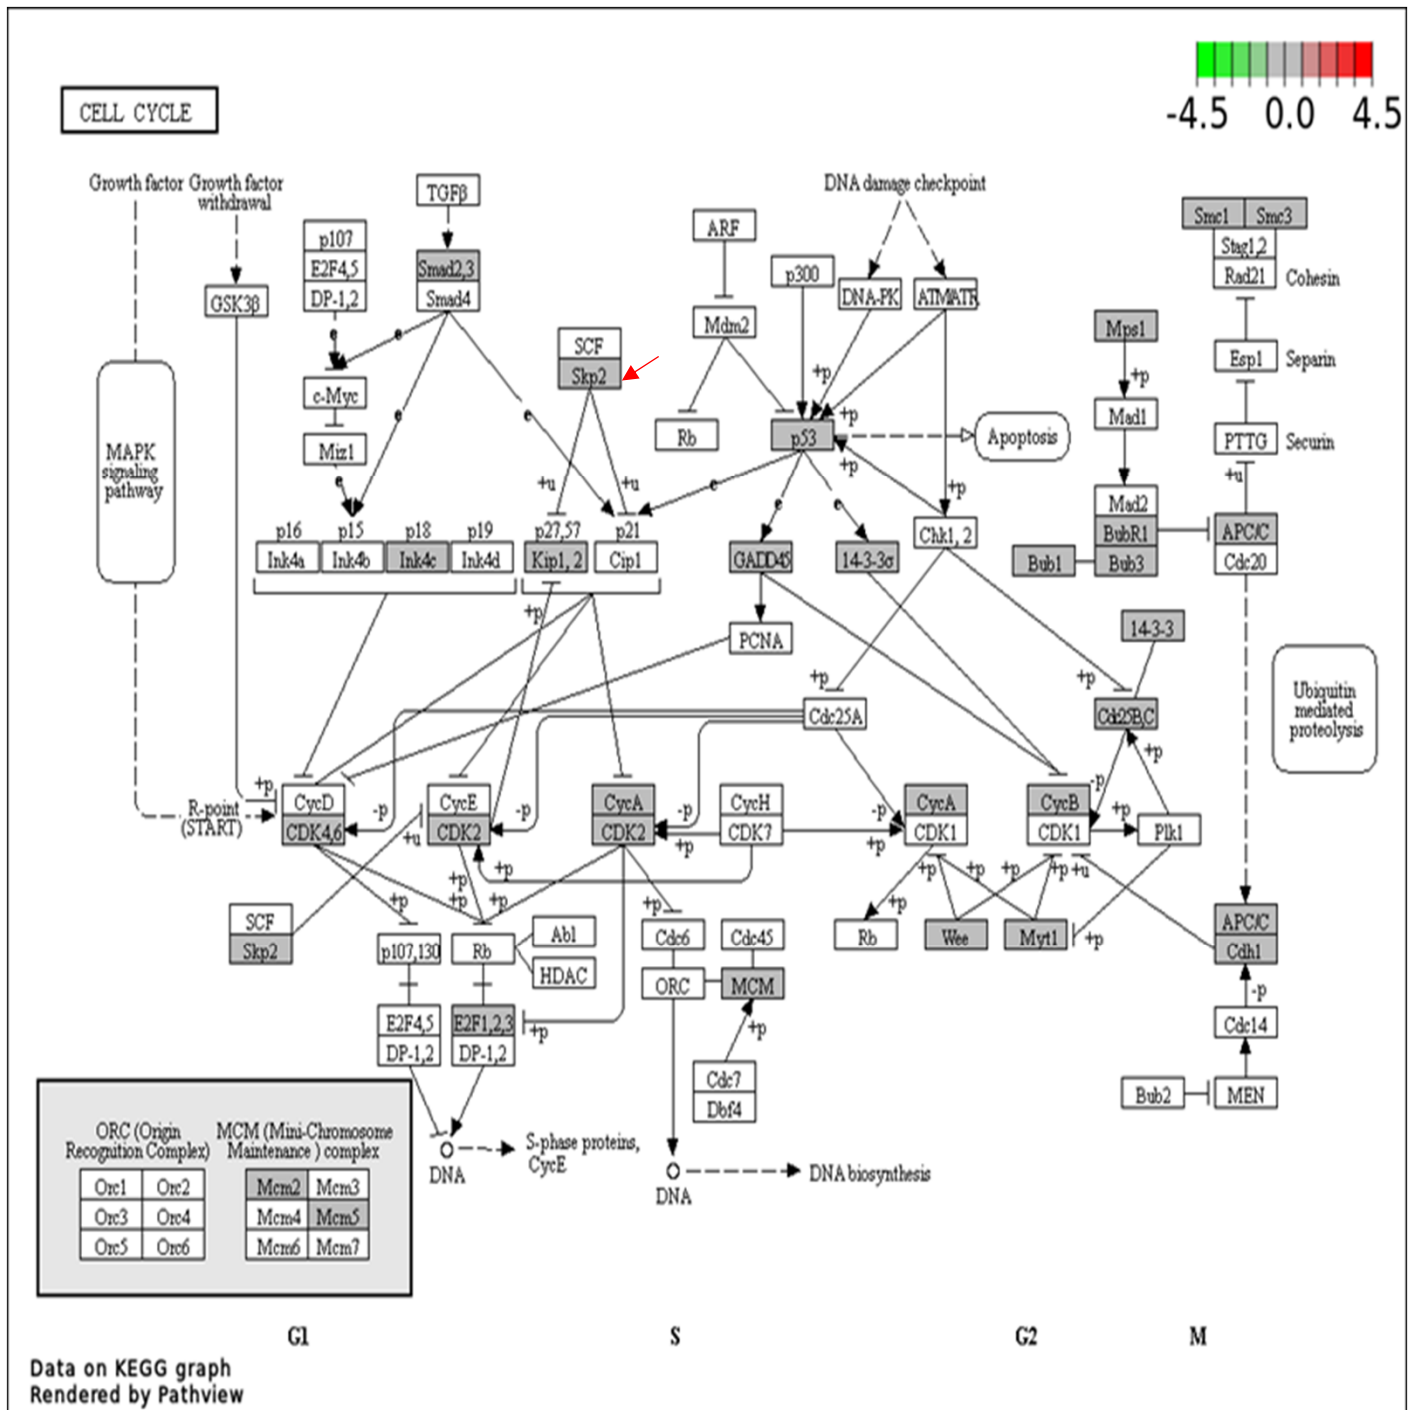

Figure S4: Significantly upregulated cell cycle pathway in Enriched Kyoto Encyclopedia of Genes and Genomes (KEGG) 24 hours after Arg treatment under high glucose conditions

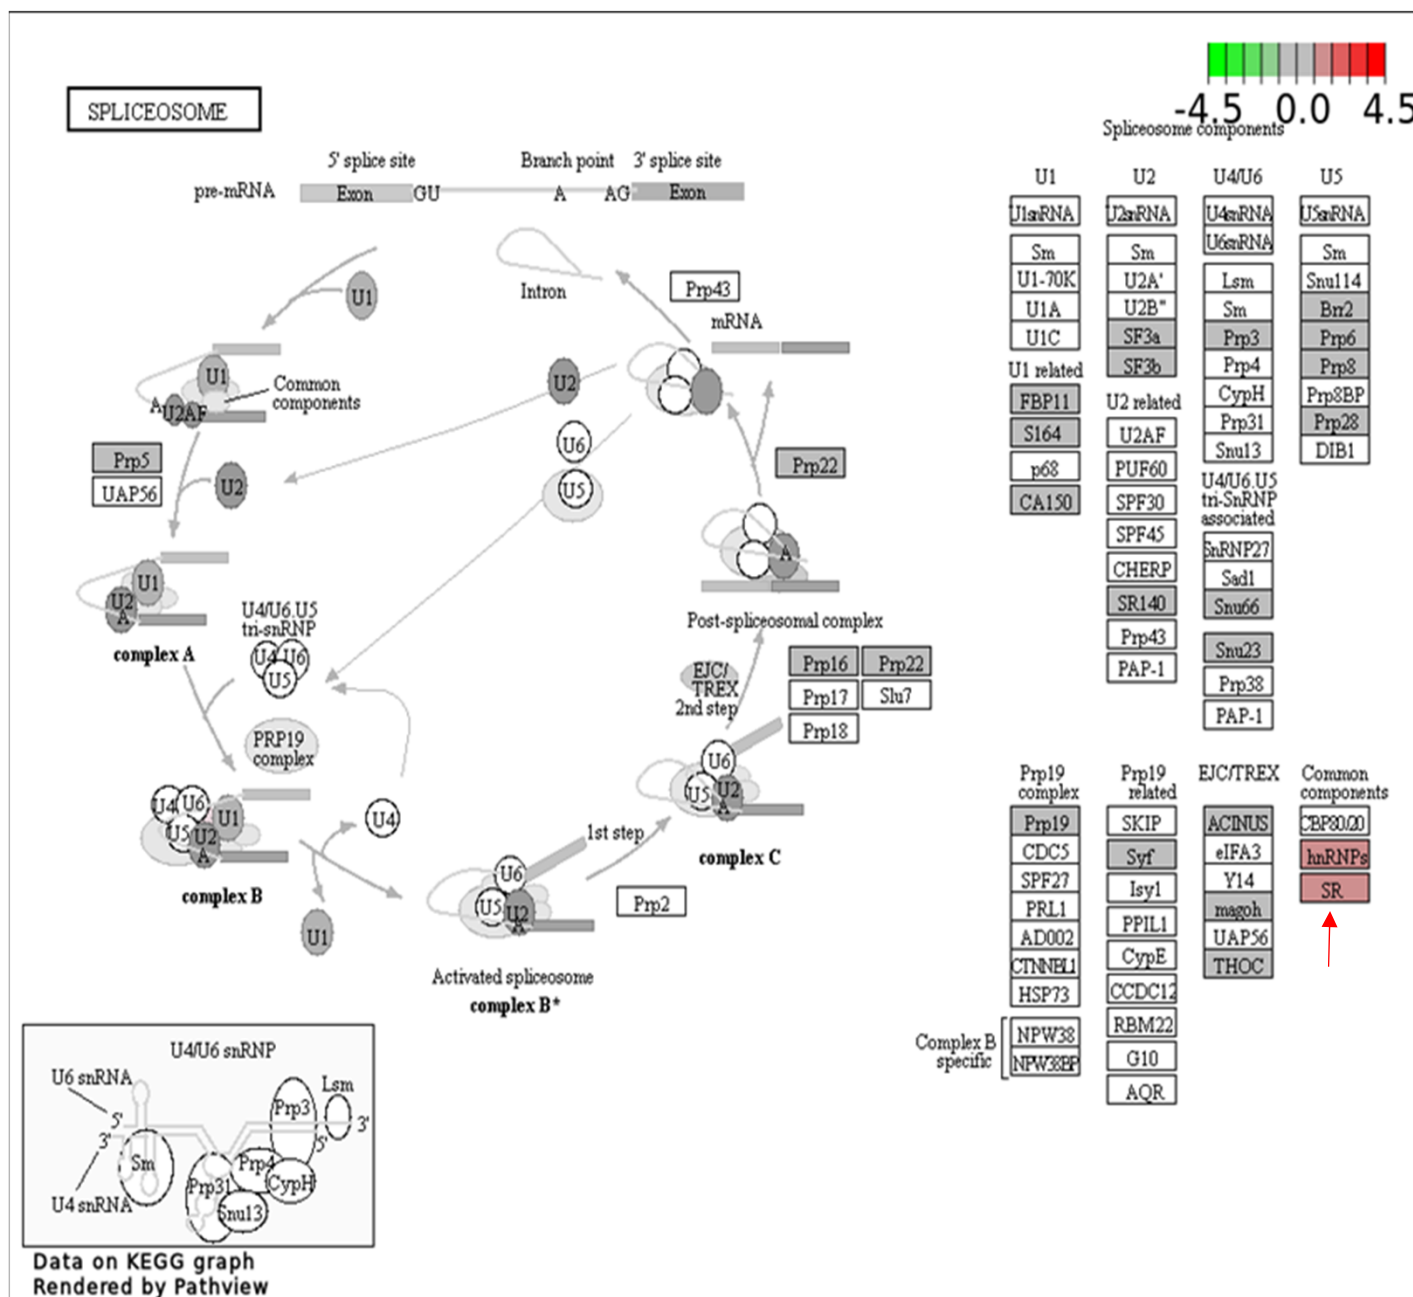

Figure S5: Significantly upregulated spliceosome pathway in Enriched Kyoto Encyclopedia of Genes and Genomes (KEGG) 24 hours after Arg treatment under high glucose conditions.





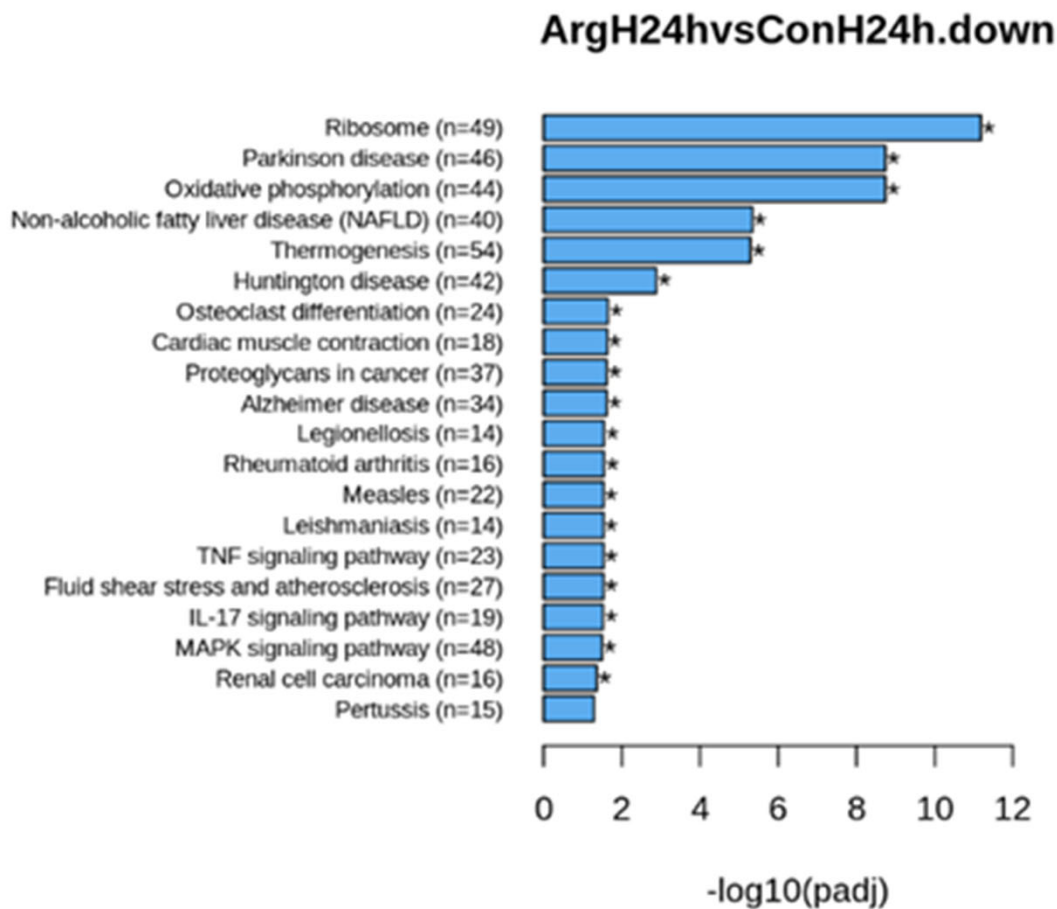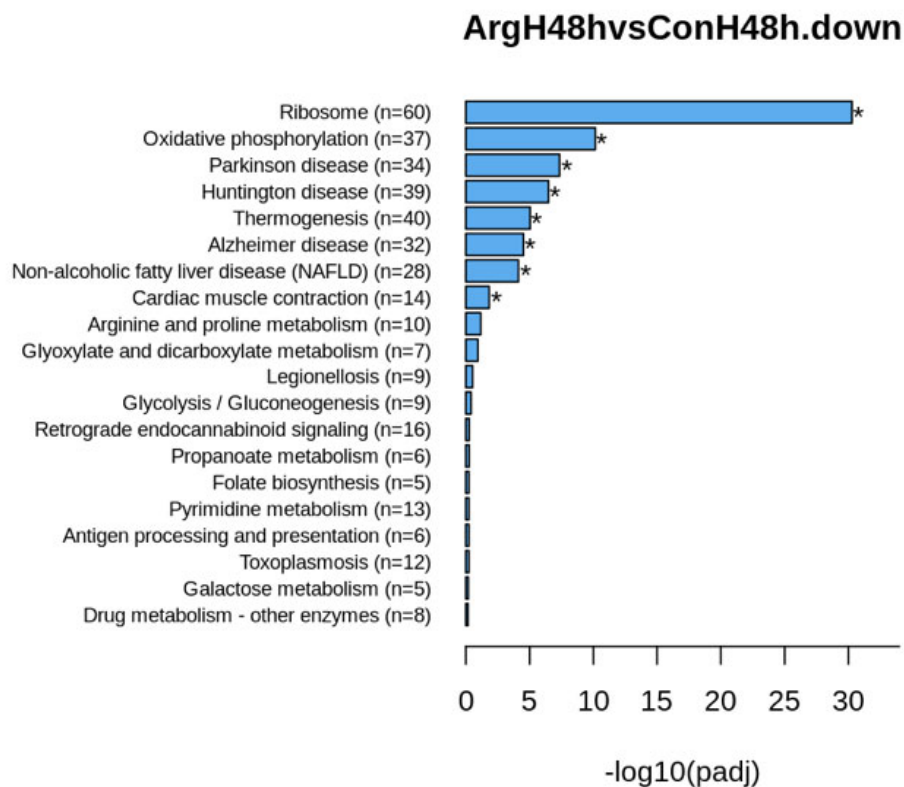

Figure S7: Top 20 downregulated enriched Kyoto Encyclopedia of Genes and Genomes (KEGG) pathways 24 and 48 hours after Arg treatment under high glucose conditions.
